# Supplementary material for: Controllable synthesis of graphitic C3N4/ultrathin MoS2 nanosheet hybrid nanostructures with enhanced photocatalytic performance
Source: Royal Society of Chemistry journal article supplement (doi:10.1039/c6dt02247b), 2016-01-01
Supplement: c6dt02247b1.pdf [file c6dt02247b1.pdf]

**Supporting Information for**  
**Controllable synthesis of Graphitic C<sub>3</sub>N<sub>4</sub>/ultrathin MoS<sub>2</sub>**  
**nanosheets hybrid nanostructures with enhanced**  
**photocatalytic performance**

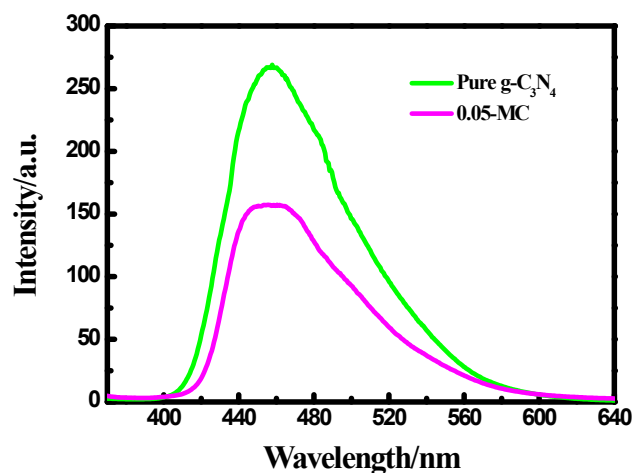

**Fig. S1 PL spectra of pure g-C<sub>3</sub>N<sub>4</sub> and 0.05-MC at an excitation wavelength of 360 nm.**

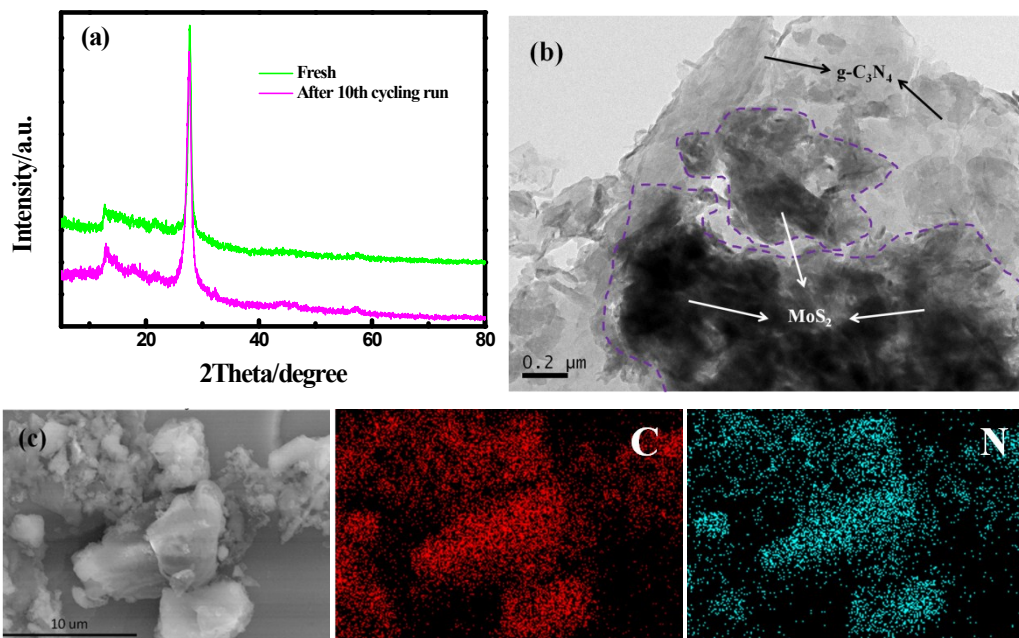

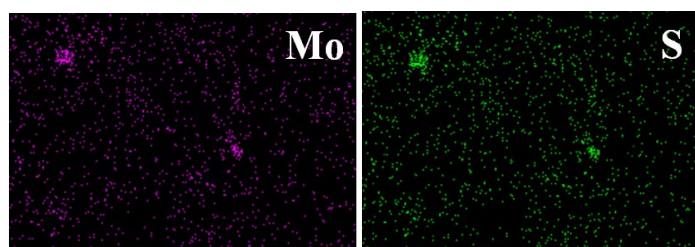

Fig. S2 (a) XRD patterns of 0.05-MC; TEM image (b) and SEM image and corresponding EDS mapping of 0.05-MC after being used for 10 times.

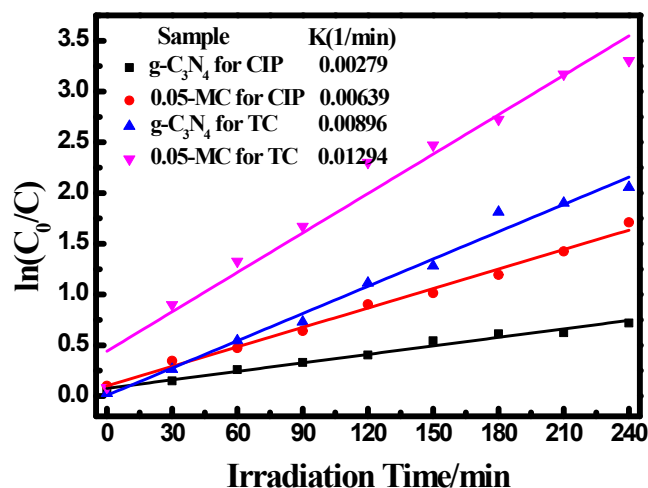

Fig. S3 Photocatalytic kinetic analysis for photodegradation CIP and TC in the presence of pure g-C<sub>3</sub>N<sub>4</sub> and 0.05-MC samples

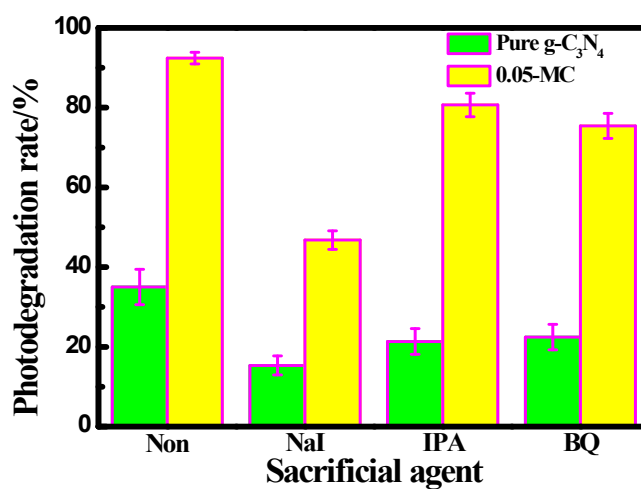

Fig. S4 Photocatalytic degradation rates of MO for pure g-C<sub>3</sub>N<sub>4</sub> and 0.05-MC with three different sacrificial agents under visible light irradiation.
